# Supplementary material for: A series of lanthanide complexes with different N-donor ligands: synthesis, structures, thermal properties and luminescence behaviors
Source: Royal Society of Chemistry journal article supplement (doi:10.1039/c6ra11393a), 2016-01-01
Supplement: c6ra11393a1.pdf [file c6ra11393a1.pdf]

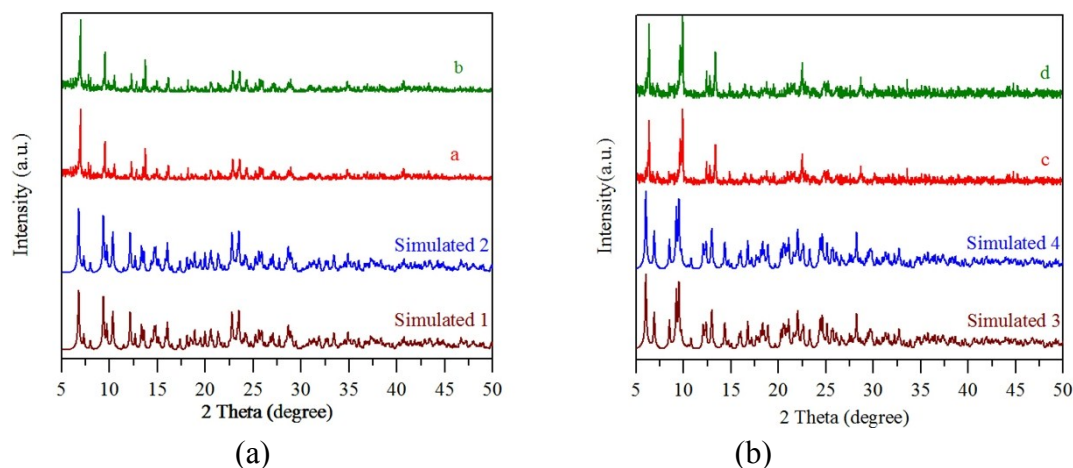

**Fig. S1** a) Simulated and experimental PXRD spectra of the complexes 1-2 (a= experimental complex 1; b=experimental complex 2. b) Simulated and experimental PXRD spectra of the complexes 3-4 (c= experimental complex 3; d=experimental complex 4).

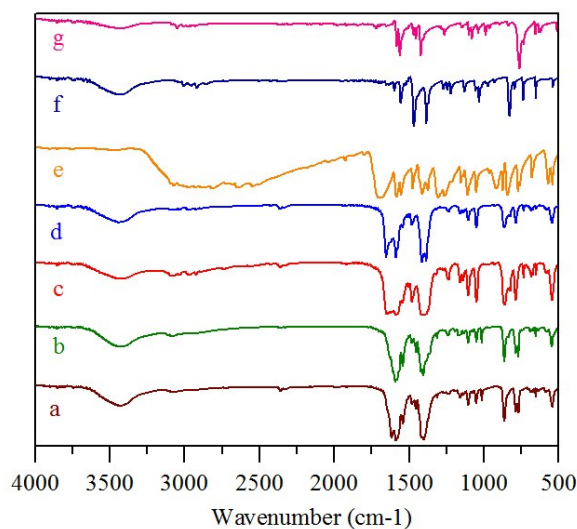

**Fig. S2** IR spectra of complex 1 (a), complex 2 (b), complex 3 (c), complex 4 (d), 2,4-DCIHBA (e), 5,5'-DM-2,2'-bipy (f), terpy (g).

**Table S1** Selected bond lengths (Å) of the title complexes<sup>a</sup>

| Complex 1    |           |               |            |
|--------------|-----------|---------------|------------|
| Eu(1)-O(5)   | 2.309(10) | Eu(1)-N(1)    | 2.537(13)  |
| Eu(1)-O(3)   | 2.406(10) | Eu(1)-N(3)    | 2.560(13)  |
| Eu(1)-O(2)   | 2.426(10) | Eu(1)-N(2)    | 2.570(12)  |
| Eu(1)-O(7)   | 2.429(9)  | Eu(1)-O(4)    | 2.620(9)   |
| Eu(1)-O(1)   | 2.474(10) |               |            |
| Complex 2    |           |               |            |
| Tb(1)-O(5)   | 2.306(3)  | Tb(1)-N(1)    | 2.539(4)   |
| Tb(1)-O(7)   | 2.389(3)  | Tb(1)-N(3)    | 2.547(4)   |
| Tb(1)-O(3)   | 2.418(3)  | Tb(1)-N(2)    | 2.577(4)   |
| Tb(1)-O(1)   | 2.449(4)  | Tb(1)-O(4)    | 2.633(4)   |
| Tb(1)-O(2)   | 2.459(4)  |               |            |
| Complex 3    |           |               |            |
| Eu(1)-O(1)   | 2.354(6)  | Eu(1)-O(7)    | 2.486(6)   |
| Eu(1)-O(4)#1 | 2.367(6)  | Eu(1)-N(2)    | 2.596(7)   |
| Eu(1)-O(5)   | 2.368(6)  | Eu(1)-N(1)    | 2.617(7)   |
| Eu(1)-O(2)#1 | 2.383(6)  | Eu(1)-Eu(1)#1 | 4.4615(10) |
| Eu(1)-O(3)   | 2.432(6)  |               |            |
| Complex 4    |           |               |            |
| Tb(1)-O(1)   | 2.327(4)  | Tb(1)-O(7)    | 2.456(4)   |
| Tb(1)-O(5)   | 2.348(5)  | Tb(1)-N(2)    | 2.578(5)   |
| Tb(1)-O(2)#1 | 2.353(5)  | Tb(1)-N(1)    | 2.597(5)   |
| Tb(1)-O(4)#1 | 2.355(4)  | Tb(1)-Tb(1)#1 | 4.4505(7)  |
| Tb(1)-O(3)   | 2.396(5)  |               |            |

<sup>a</sup>Symmetry transformations used to generate equivalent atoms: #1: - x + 1, -y + 1, -z .

**Table S2** Experimental molar heat capacities of complexes 1-4

| T(K)   | Complex 1                                                | Complex 2                                                | Complex 3                                                | Complex 4                                                |
|--------|----------------------------------------------------------|----------------------------------------------------------|----------------------------------------------------------|----------------------------------------------------------|
|        | C <sub>p,m</sub> (J·mol <sup>-1</sup> ·K <sup>-1</sup> ) |
| 263.15 | 672.72                                                   | 704.47                                                   | 1384.75                                                  | 1511.08                                                  |
| 264.15 | 675.17                                                   | 706.69                                                   | 1389.41                                                  | 1515.60                                                  |
| 265.15 | 677.43                                                   | 708.77                                                   | 1393.86                                                  | 1519.87                                                  |
| 266.15 | 679.70                                                   | 710.87                                                   | 1398.15                                                  | 1523.95                                                  |
| 267.15 | 682.05                                                   | 713.06                                                   | 1402.52                                                  | 1528.15                                                  |
| 268.15 | 684.32                                                   | 715.14                                                   | 1406.97                                                  | 1532.46                                                  |
| 269.15 | 686.52                                                   | 717.13                                                   | 1411.36                                                  | 1536.72                                                  |
| 270.15 | 688.77                                                   | 719.14                                                   | 1415.55                                                  | 1540.78                                                  |
| 271.15 | 691.02                                                   | 721.11                                                   | 1419.69                                                  | 1544.76                                                  |
| 272.15 | 693.20                                                   | 723.02                                                   | 1424.05                                                  | 1548.98                                                  |
| 273.15 | 695.31                                                   | 724.88                                                   | 1428.54                                                  | 1553.36                                                  |
| 274.15 | 697.32                                                   | 726.70                                                   | 1432.89                                                  | 1557.53                                                  |
| 275.15 | 699.28                                                   | 728.51                                                   | 1437.09                                                  | 1561.59                                                  |
| 276.15 | 701.25                                                   | 730.37                                                   | 1441.31                                                  | 1565.74                                                  |
| 277.15 | 703.26                                                   | 732.22                                                   | 1445.64                                                  | 1569.99                                                  |
| 278.15 | 705.30                                                   | 734.02                                                   | 1449.97                                                  | 1574.09                                                  |
| 279.15 | 707.31                                                   | 735.76                                                   | 1454.12                                                  | 1578.06                                                  |
| 280.15 | 709.24                                                   | 737.49                                                   | 1458.22                                                  | 1582.10                                                  |
| 281.15 | 711.11                                                   | 739.21                                                   | 1462.21                                                  | 1586.02                                                  |
| 282.15 | 713.02                                                   | 741.05                                                   | 1466.03                                                  | 1589.65                                                  |
| 283.15 | 715.04                                                   | 743.01                                                   | 1469.99                                                  | 1593.34                                                  |
| 284.15 | 717.17                                                   | 745.03                                                   | 1474.17                                                  | 1597.37                                                  |
| 285.15 | 719.30                                                   | 747.08                                                   | 1478.32                                                  | 1601.53                                                  |
| 286.15 | 721.36                                                   | 749.02                                                   | 1482.34                                                  | 1605.59                                                  |
| 287.15 | 723.42                                                   | 750.90                                                   | 1486.34                                                  | 1609.48                                                  |
| 288.15 | 725.54                                                   | 752.86                                                   | 1490.42                                                  | 1613.31                                                  |
| 289.15 | 727.70                                                   | 754.91                                                   | 1494.52                                                  | 1617.10                                                  |
| 290.15 | 729.90                                                   | 756.99                                                   | 1498.57                                                  | 1620.87                                                  |
| 291.15 | 732.14                                                   | 759.09                                                   | 1502.68                                                  | 1624.80                                                  |
| 292.15 | 734.49                                                   | 761.29                                                   | 1506.92                                                  | 1628.86                                                  |
| 293.15 | 737.01                                                   | 763.63                                                   | 1511.11                                                  | 1632.76                                                  |
| 294.15 | 739.51                                                   | 765.91                                                   | 1515.19                                                  | 1636.56                                                  |
| 295.15 | 741.94                                                   | 768.13                                                   | 1519.14                                                  | 1640.28                                                  |
| 296.15 | 744.37                                                   | 770.45                                                   | 1523.21                                                  | 1644.14                                                  |
| 297.15 | 746.77                                                   | 772.79                                                   | 1527.46                                                  | 1648.22                                                  |
| 298.15 | 749.12                                                   | 775.09                                                   | 1531.75                                                  | 1652.32                                                  |
| 299.15 | 751.46                                                   | 777.42                                                   | 1535.85                                                  | 1656.19                                                  |

|        |        |        |         |         |
|--------|--------|--------|---------|---------|
| 300.15 | 753.86 | 779.78 | 1540.01 | 1660.02 |
| 301.15 | 756.33 | 782.15 | 1544.55 | 1664.08 |
| 302.15 | 758.88 | 784.60 | 1549.26 | 1668.36 |
| 303.15 | 761.46 | 787.06 | 1553.90 | 1672.59 |
| 304.15 | 764.03 | 789.51 | 1558.35 | 1676.58 |
| 305.15 | 766.62 | 792.01 | 1562.84 | 1680.75 |
| 306.15 | 769.18 | 794.60 | 1567.42 | 1685.04 |
| 307.15 | 771.77 | 797.20 | 1572.13 | 1689.18 |
| 308.15 | 774.44 | 799.74 | 1577.06 | 1693.43 |
| 309.15 | 777.03 | 802.13 | 1581.96 | 1697.85 |
| 310.15 | 779.52 | 804.49 | 1586.67 | 1702.23 |
| 311.15 | 782.03 | 806.91 | 1591.38 | 1706.51 |
| 312.15 | 784.60 | 809.44 | 1596.25 | 1710.96 |
| 313.15 | 787.19 | 811.98 | 1601.17 | 1715.55 |
| 314.15 | 789.69 | 814.47 | 1605.93 | 1720.04 |
| 315.15 | 792.19 | 817.01 | 1610.59 | 1724.33 |
| 316.15 | 794.79 | 819.72 | 1615.50 | 1728.90 |
| 317.15 | 797.44 | 822.51 | 1620.68 | 1733.79 |
| 318.15 | 800.07 | 825.24 | 1625.70 | 1738.54 |
| 319.15 | 802.68 | 827.89 | 1630.34 | 1742.91 |
| 320.15 | 805.26 | 830.64 | 1634.76 | 1747.11 |
| 321.15 | 807.83 | 833.55 | 1639.08 | 1751.25 |
| 322.15 | 810.52 | 836.64 | 1643.32 | 1755.23 |
| 323.15 | 813.43 | 839.95 | 1647.54 | 1759.23 |
| 324.15 | 816.39 | 843.35 | 1651.91 | 1763.52 |
| 325.15 | 819.24 | 846.62 | 1656.18 | 1767.76 |
| 326.15 | 821.98 | 849.76 | 1660.15 | 1771.66 |
| 327.15 | 824.71 | 852.95 | 1663.76 | 1775.23 |
| 328.15 | 827.43 | 856.21 | 1667.20 | 1778.56 |
| 329.15 | 830.16 | 859.68 | 1671.01 | 1782.09 |
| 330.15 | 833.05 | 863.58 | 1675.13 | 1785.90 |
| 331.15 | 836.19 | 867.80 | 1679.50 | 1789.85 |
| 332.15 | 839.35 | 871.88 | 1684.07 | 1793.97 |
| 333.15 | 842.29 | 875.62 | 1688.48 | 1797.84 |
| 334.15 | 845.20 | 879.37 | 1692.76 | 1801.41 |
| 335.15 | 848.13 | 883.29 | 1697.09 | 1804.97 |
| 336.15 | 851.06 | 887.25 | 1701.49 | 1808.52 |
| 337.15 | 854.14 | 891.25 | 1705.75 | 1811.97 |

---

**Table S3** Smoothed molar heat capacities and thermodynamic functions of complex 1

| <b>T(K)</b> | <b>C<sub>p,m</sub>(JK<sup>-1</sup>mol<sup>-1</sup>)</b> | <b>H<sub>T</sub>-H<sub>298.15K</sub>(kJmol<sup>-1</sup>)</b> | <b>S<sub>T</sub>-S<sub>298.15K</sub>(JK<sup>-1</sup>mol<sup>-1</sup>)</b> | <b>G<sub>T</sub>-G<sub>298.15K</sub>(kJmol<sup>-1</sup>)</b> |
|-------------|---------------------------------------------------------|--------------------------------------------------------------|---------------------------------------------------------------------------|--------------------------------------------------------------|
| 263.15      | 672.82                                                  | -24.874                                                      | -88.65                                                                    | -1.546                                                       |
| 266.15      | 679.73                                                  | -22.845                                                      | -80.98                                                                    | -1.292                                                       |
| 269.15      | 686.61                                                  | -20.795                                                      | -73.32                                                                    | -1.06                                                        |
| 272.15      | 693.14                                                  | -18.726                                                      | -65.68                                                                    | -0.852                                                       |
| 275.15      | 699.31                                                  | -16.637                                                      | -58.04                                                                    | -0.666                                                       |
| 278.15      | 705.25                                                  | -14.53                                                       | -50.43                                                                    | -0.504                                                       |
| 281.15      | 711.14                                                  | -12.406                                                      | -42.83                                                                    | -0.364                                                       |
| 284.15      | 717.16                                                  | -10.263                                                      | -35.25                                                                    | -0.247                                                       |
| 287.15      | 723.44                                                  | -8.102                                                       | -27.69                                                                    | -0.152                                                       |
| 290.15      | 730.02                                                  | -5.922                                                       | -20.13                                                                    | -0.081                                                       |
| 293.15      | 736.93                                                  | -3.722                                                       | -12.59                                                                    | -0.031                                                       |
| 296.15      | 744.12                                                  | -1.501                                                       | -5.05                                                                     | -0.005                                                       |
| 299.15      | 751.52                                                  | 0.758                                                        | 2.54                                                                      | -0.001                                                       |
| 302.15      | 759.06                                                  | 3.024                                                        | 10.07                                                                     | -0.02                                                        |
| 305.15      | 766.68                                                  | 5.312                                                        | 17.61                                                                     | -0.062                                                       |
| 308.15      | 774.32                                                  | 7.624                                                        | 25.15                                                                     | -0.126                                                       |
| 311.15      | 781.98                                                  | 9.958                                                        | 32.69                                                                     | -0.212                                                       |
| 314.15      | 789.67                                                  | 12.316                                                       | 40.23                                                                     | -0.322                                                       |
| 317.15      | 797.44                                                  | 14.696                                                       | 47.77                                                                     | -0.454                                                       |
| 320.15      | 805.34                                                  | 17.101                                                       | 55.31                                                                     | -0.608                                                       |
| 323.15      | 813.45                                                  | 19.529                                                       | 62.86                                                                     | -0.786                                                       |
| 326.15      | 821.79                                                  | 21.982                                                       | 70.42                                                                     | -0.985                                                       |
| 329.15      | 830.39                                                  | 24.46                                                        | 77.98                                                                     | -1.208                                                       |
| 332.15      | 839.2                                                   | 26.964                                                       | 85.56                                                                     | -1.453                                                       |
| 335.15      | 848.14                                                  | 29.495                                                       | 93.14                                                                     | -1.721                                                       |

**Table S4** Smoothed molar heat capacities and thermodynamic functions of complex 2

| <b>T(K)</b> | <b>C<sub>p,m</sub>(JK<sup>-1</sup>mol<sup>-1</sup>)</b> | <b>H<sub>T</sub>-H<sub>298.15K</sub>(kJmol<sup>-1</sup>)</b> | <b>S<sub>T</sub>-S<sub>298.15K</sub>(JK<sup>-1</sup>mol<sup>-1</sup>)</b> | <b>G<sub>T</sub>-G<sub>298.15K</sub>(kJmol<sup>-1</sup>)</b> |
|-------------|---------------------------------------------------------|--------------------------------------------------------------|---------------------------------------------------------------------------|--------------------------------------------------------------|
| 263.15      | 705.35                                                  | -25.929                                                      | -92.42                                                                    | -1.609                                                       |
| 266.15      | 712.12                                                  | -23.802                                                      | -84.38                                                                    | -1.344                                                       |
| 269.15      | 718.34                                                  | -21.657                                                      | -76.37                                                                    | -1.103                                                       |
| 272.15      | 724.19                                                  | -19.493                                                      | -68.37                                                                    | -0.886                                                       |
| 275.15      | 729.82                                                  | -17.312                                                      | -60.4                                                                     | -0.693                                                       |
| 278.15      | 735.36                                                  | -15.114                                                      | -52.46                                                                    | -0.523                                                       |
| 281.15      | 740.94                                                  | -12.9                                                        | -44.54                                                                    | -0.378                                                       |
| 284.15      | 746.67                                                  | -10.668                                                      | -36.64                                                                    | -0.256                                                       |
| 287.15      | 752.66                                                  | -8.419                                                       | -28.77                                                                    | -0.158                                                       |
| 290.15      | 758.97                                                  | -6.152                                                       | -20.91                                                                    | -0.084                                                       |
| 293.15      | 765.65                                                  | -3.865                                                       | -13.07                                                                    | -0.033                                                       |
| 296.15      | 772.67                                                  | -1.558                                                       | -5.24                                                                     | -0.005                                                       |
| 299.15      | 779.97                                                  | 0.787                                                        | 2.63                                                                      | -0.001                                                       |
| 302.15      | 787.49                                                  | 3.138                                                        | 10.45                                                                     | -0.021                                                       |
| 305.15      | 795.14                                                  | 5.512                                                        | 18.27                                                                     | -0.064                                                       |
| 308.15      | 802.87                                                  | 7.909                                                        | 26.09                                                                     | -0.13                                                        |
| 311.15      | 810.7                                                   | 10.329                                                       | 33.9                                                                      | -0.22                                                        |
| 314.15      | 818.69                                                  | 12.773                                                       | 41.72                                                                     | -0.334                                                       |
| 317.15      | 827.02                                                  | 15.242                                                       | 49.54                                                                     | -0.471                                                       |
| 320.15      | 835.93                                                  | 17.736                                                       | 57.37                                                                     | -0.631                                                       |
| 323.15      | 845.67                                                  | 20.258                                                       | 65.21                                                                     | -0.815                                                       |
| 326.15      | 856.46                                                  | 22.811                                                       | 73.07                                                                     | -1.022                                                       |
| 329.15      | 868.29                                                  | 25.398                                                       | 80.97                                                                     | -1.253                                                       |
| 332.15      | 880.72                                                  | 28.022                                                       | 88.9                                                                      | -1.508                                                       |
| 335.15      | 892.59                                                  | 30.682                                                       | 96.88                                                                     | -1.787                                                       |

**Table S5** Smoothed molar heat capacities and thermodynamic functions of complex 3

| <b>T(K)</b> | <b>C<sub>p,m</sub>(JK<sup>-1</sup>mol<sup>-1</sup>)</b> | <b>H<sub>T</sub>-H<sub>298.15K</sub>(kJmol<sup>-1</sup>)</b> | <b>S<sub>T</sub>-S<sub>298.15K</sub>(JK<sup>-1</sup>mol<sup>-1</sup>)</b> | <b>G<sub>T</sub>-G<sub>298.15K</sub>(kJmol<sup>-1</sup>)</b> |
|-------------|---------------------------------------------------------|--------------------------------------------------------------|---------------------------------------------------------------------------|--------------------------------------------------------------|
| 263.15      | 1384.72                                                 | -51.09                                                       | -182.09                                                                   | -3.173                                                       |
| 266.15      | 1398.26                                                 | -46.916                                                      | -166.32                                                                   | -2.651                                                       |
| 269.15      | 1411.3                                                  | -42.701                                                      | -150.57                                                                   | -2.176                                                       |
| 272.15      | 1424.19                                                 | -38.448                                                      | -134.85                                                                   | -1.748                                                       |
| 275.15      | 1436.99                                                 | -34.156                                                      | -119.17                                                                   | -1.367                                                       |
| 278.15      | 1449.67                                                 | -29.826                                                      | -103.52                                                                   | -1.033                                                       |
| 281.15      | 1462.17                                                 | -25.459                                                      | -87.9                                                                     | -0.746                                                       |
| 284.15      | 1474.45                                                 | -21.054                                                      | -72.32                                                                    | -0.505                                                       |
| 287.15      | 1486.57                                                 | -16.612                                                      | -56.77                                                                    | -0.312                                                       |
| 290.15      | 1498.62                                                 | -12.135                                                      | -41.25                                                                    | -0.165                                                       |
| 293.15      | 1510.75                                                 | -7.621                                                       | -25.78                                                                    | -0.064                                                       |
| 296.15      | 1523.13                                                 | -3.07                                                        | -10.33                                                                    | -0.01                                                        |
| 299.15      | 1535.89                                                 | 1.549                                                        | 5.19                                                                      | -0.003                                                       |
| 302.15      | 1549.14                                                 | 6.177                                                        | 20.58                                                                     | -0.041                                                       |
| 305.15      | 1562.9                                                  | 10.845                                                       | 35.95                                                                     | -0.126                                                       |
| 308.15      | 1577.1                                                  | 15.555                                                       | 51.31                                                                     | -0.257                                                       |
| 311.15      | 1591.6                                                  | 20.308                                                       | 66.66                                                                     | -0.434                                                       |
| 314.15      | 1606.15                                                 | 25.104                                                       | 82                                                                        | -0.657                                                       |
| 317.15      | 1620.5                                                  | 29.944                                                       | 97.34                                                                     | -0.925                                                       |
| 320.15      | 1634.36                                                 | 34.827                                                       | 112.66                                                                    | -1.24                                                        |
| 323.15      | 1647.53                                                 | 39.75                                                        | 127.96                                                                    | -1.601                                                       |
| 326.15      | 1659.96                                                 | 44.712                                                       | 143.25                                                                    | -2.008                                                       |
| 329.15      | 1671.85                                                 | 49.709                                                       | 158.5                                                                     | -2.461                                                       |
| 332.15      | 1683.74                                                 | 54.743                                                       | 173.72                                                                    | -2.959                                                       |
| 335.15      | 1696.67                                                 | 59.813                                                       | 188.92                                                                    | -3.503                                                       |

**Table S6** Smoothed molar heat capacities and thermodynamic functions of complex 4

| T(K)   | C <sub>p,m</sub> (JK <sup>-1</sup> mol <sup>-1</sup> ) | H <sub>T</sub> -H <sub>298.15K</sub> (kJmol <sup>-1</sup> ) | S <sub>T</sub> -S <sub>298.15K</sub> (JK <sup>-1</sup> mol <sup>-1</sup> ) | G <sub>T</sub> -G <sub>298.15K</sub> (kJmol <sup>-1</sup> ) |
|--------|--------------------------------------------------------|-------------------------------------------------------------|----------------------------------------------------------------------------|-------------------------------------------------------------|
| 263.15 | 1511.19                                                | -55.421                                                     | -197.55                                                                    | -3.436                                                      |
| 266.15 | 1524.01                                                | -50.868                                                     | -180.34                                                                    | -2.87                                                       |
| 269.15 | 1536.64                                                | -46.277                                                     | -163.19                                                                    | -2.354                                                      |
| 272.15 | 1549.16                                                | -41.649                                                     | -146.09                                                                    | -1.891                                                      |
| 275.15 | 1561.57                                                | -36.983                                                     | -129.04                                                                    | -1.478                                                      |
| 278.15 | 1573.82                                                | -32.28                                                      | -112.04                                                                    | -1.116                                                      |
| 281.15 | 1585.88                                                | -27.54                                                      | -95.09                                                                     | -0.806                                                      |
| 284.15 | 1597.75                                                | -22.765                                                     | -78.19                                                                     | -0.546                                                      |
| 287.15 | 1609.44                                                | -17.954                                                     | -61.35                                                                     | -0.337                                                      |
| 290.15 | 1621.02                                                | -13.108                                                     | -44.56                                                                     | -0.178                                                      |
| 293.15 | 1632.57                                                | -8.228                                                      | -27.83                                                                     | -0.07                                                       |
| 296.15 | 1644.22                                                | -3.313                                                      | -11.15                                                                     | -0.011                                                      |
| 299.15 | 1656.07                                                | 1.671                                                       | 5.59                                                                       | -0.003                                                      |
| 302.15 | 1668.22                                                | 6.657                                                       | 22.18                                                                      | -0.044                                                      |
| 305.15 | 1680.73                                                | 11.68                                                       | 38.72                                                                      | -0.136                                                      |
| 308.15 | 1693.61                                                | 16.742                                                      | 55.23                                                                      | -0.277                                                      |
| 311.15 | 1706.8                                                 | 21.842                                                      | 71.7                                                                       | -0.467                                                      |
| 314.15 | 1720.18                                                | 26.983                                                      | 88.14                                                                      | -0.707                                                      |
| 317.15 | 1733.56                                                | 32.164                                                      | 104.55                                                                     | -0.995                                                      |
| 320.15 | 1746.72                                                | 37.384                                                      | 120.94                                                                     | -1.334                                                      |
| 323.15 | 1759.4                                                 | 42.644                                                      | 137.29                                                                     | -1.721                                                      |
| 326.15 | 1771.45                                                | 47.94                                                       | 153.6                                                                      | -2.157                                                      |
| 329.15 | 1782.8                                                 | 53.272                                                      | 169.87                                                                     | -2.642                                                      |
| 332.15 | 1793.68                                                | 58.637                                                      | 186.1                                                                      | -3.176                                                      |
| 335.15 | 1804.68                                                | 64.034                                                      | 202.28                                                                     | -3.759                                                      |

**Table S7** The CIE coordinates of the title complexes.

| Complexes | CIE coordinates |       |       |
|-----------|-----------------|-------|-------|
|           | x               | y     | z     |
| 1         | 0.664           | 0.335 | 0.000 |
| 2         | 0.324           | 0.592 | 0.084 |
| 3         | 0.649           | 0.350 | 0.000 |
| 4         | 0.331           | 0.579 | 0.090 |
